# Supplementary figures and images for: Nucleophilicity of the boron atom in compounds R–B, (R = F, Cl, Br, I, CN, NC, CH3, SiH3, CF3, H): a new look at the inductive effects of the group R
Source: Royal Society of Chemistry journal article supplement (doi:10.1039/d2cp01565j), 2022-01-01

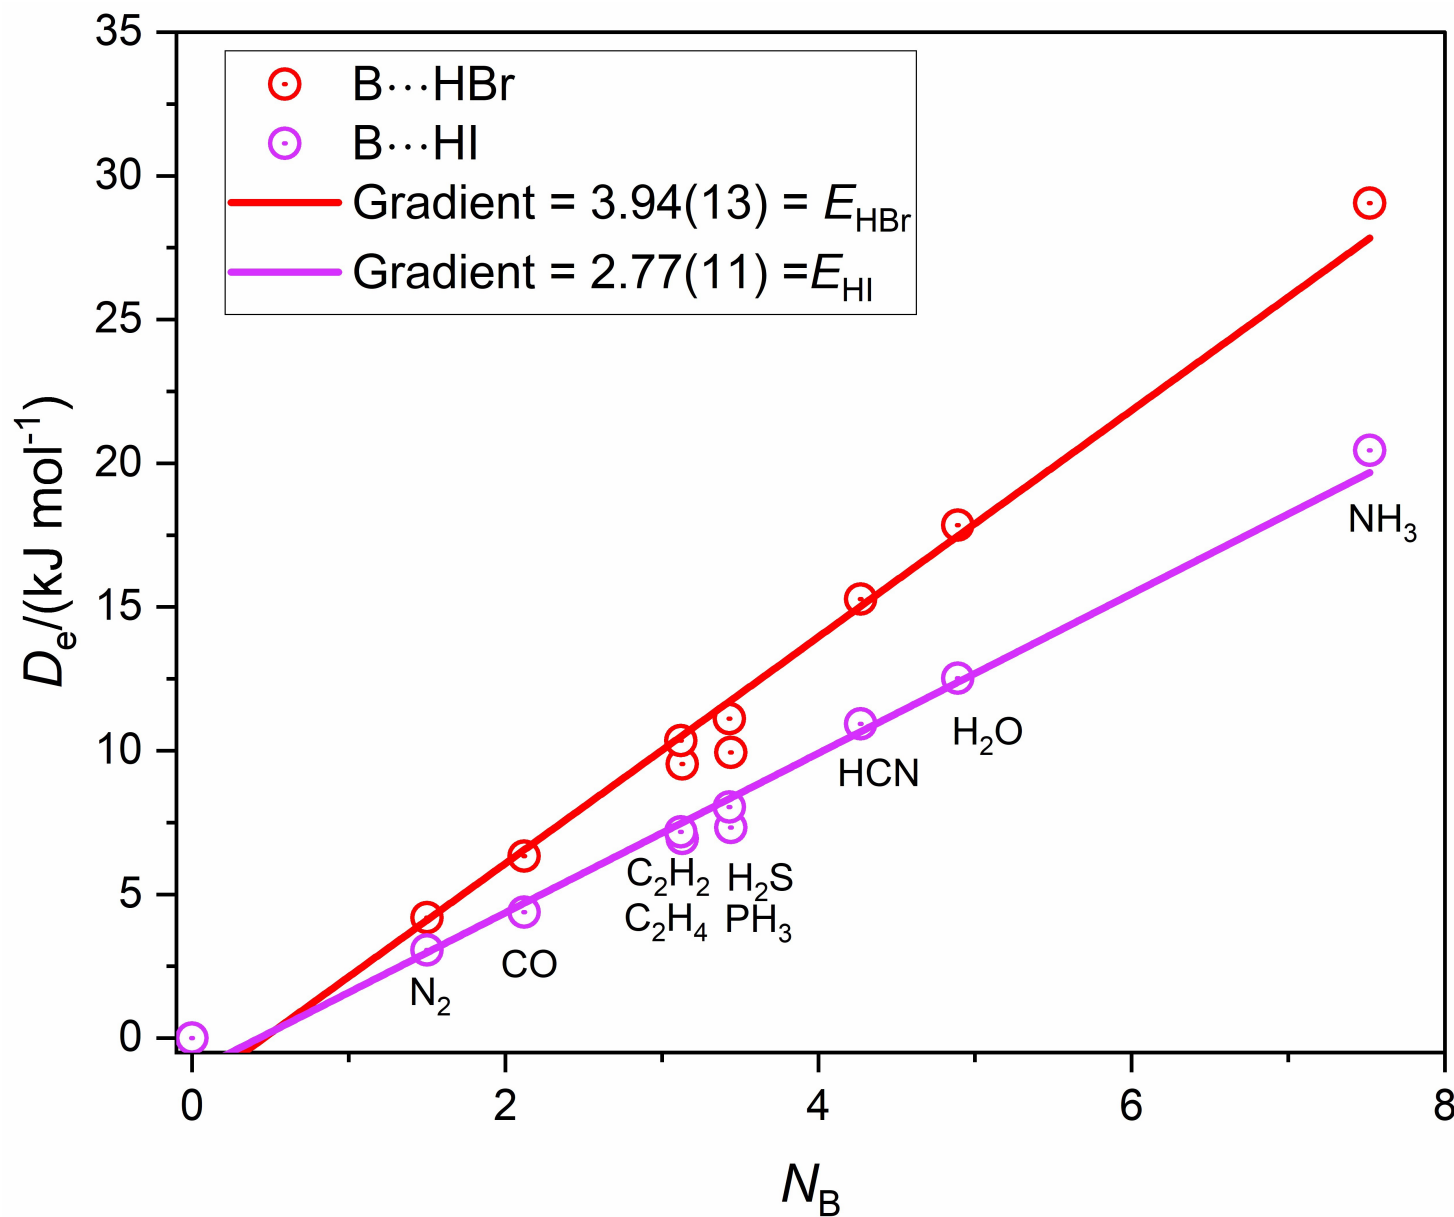

Supplement: d2cp01565j1.pdf [file d2cp01565j1.pdf]

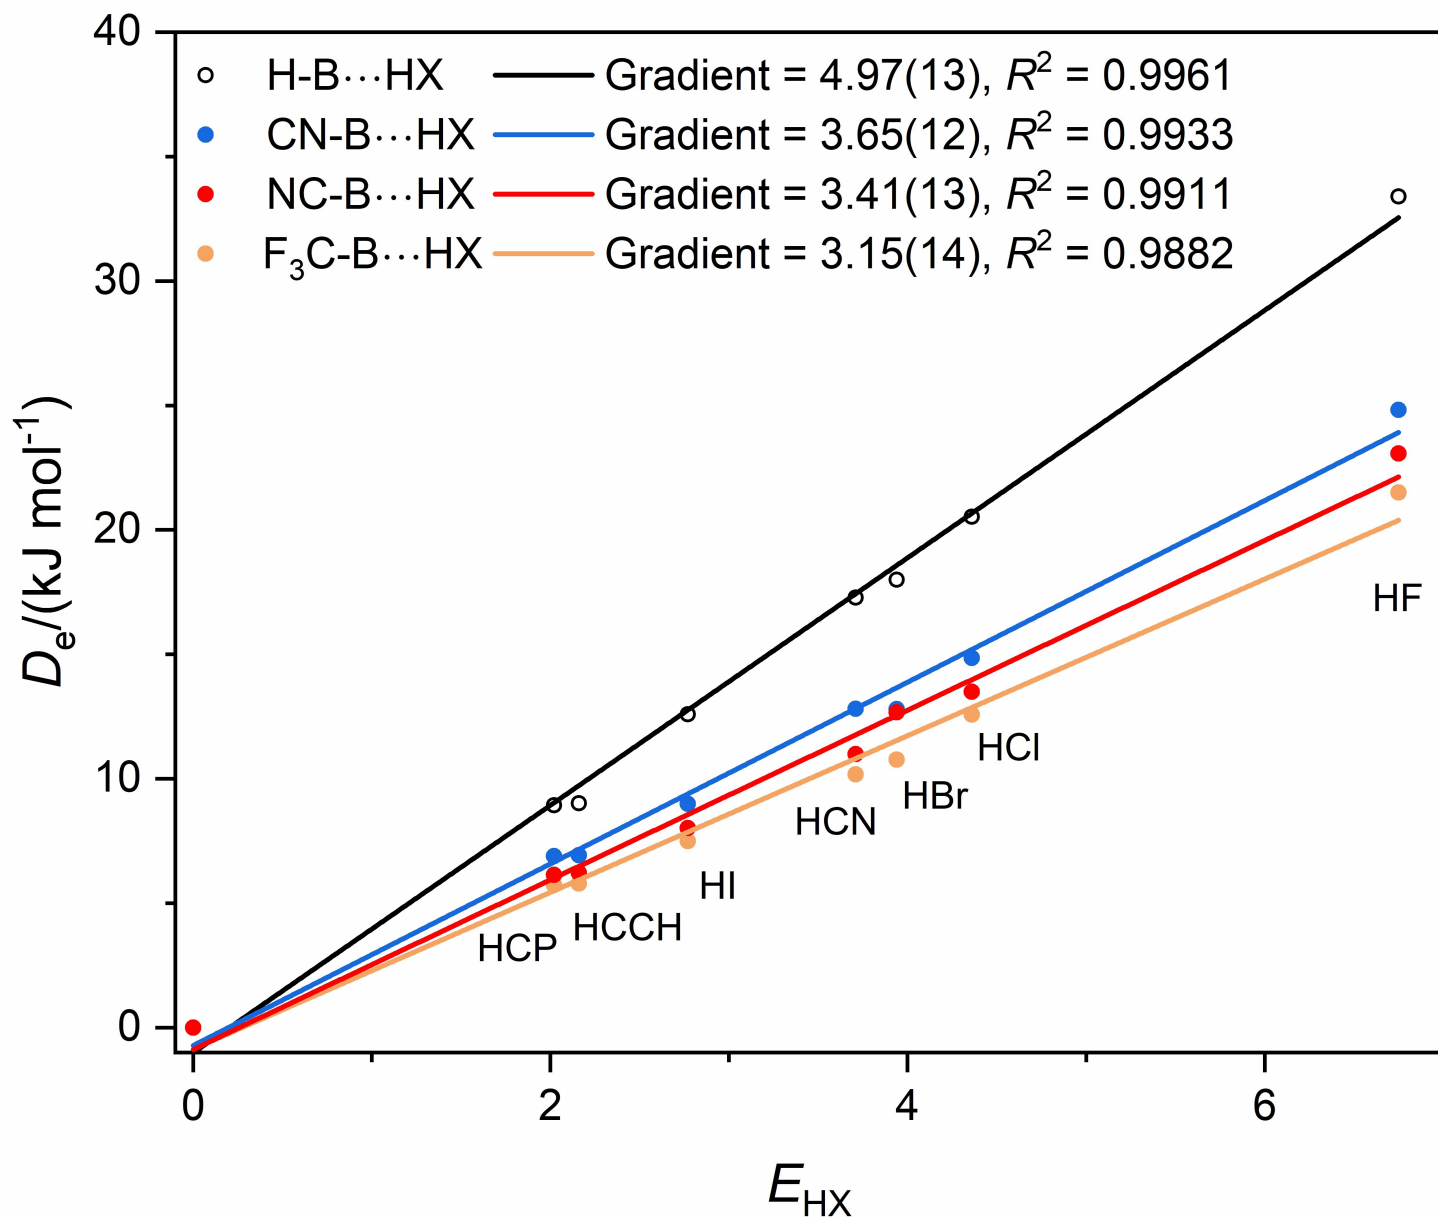

Supplement: d2cp01565j2.pdf [file d2cp01565j2.pdf]
